# Supplementary material
Source: Research Square preprint supplement (doi:10.21203/rs.3.rs-9150280/v1)
Supplement: Supplementary file 1 [file f7ce22e9b3bb6482f678cb21.docx]

**Structure and Content of the Final Questionnaire**

| **Preparing Future Physicians: Survey on Digital Skills and AI in Medicine**  **This survey aims to understand your experience and attitudes toward digital tools and artificial intelligence (AI) to help improve medical education and better prepare you for technology-driven healthcare. This introduction explains what digital literacy and artificial intelligence (AI) mean in the context of medical education and healthcare.**  ***Digital literacy*** *means having the skills and knowledge to effectively use digital technologies and tools in your daily life and professional work. In the context of medical education and healthcare, digital literacy includes the ability to:*   - *Use software applications like word processors, spreadsheets, and presentation tools for documentation and communication.* - *Navigate and manage electronic health records (EHRs) and clinical databases.* - *Utilize digital diagnostic devices (e.g., digital stethoscopes, portable ultrasound).* - *Operate telemedicine platforms for patient consultations.* - *Apply data analysis and visualization tools to interpret medical data.* - *Understand and critically evaluate artificial intelligence (AI) applications, such as AI-driven diagnostic aids or decision-support systems.*   ***Artificial Intelligence (AI)*** *refers to computer systems or software designed to perform tasks that usually require human intelligence. In healthcare, AI can:*   - *Help analyze medical images like X-rays or MRIs to assist in diagnosis.* - *Support clinical decision-making by suggesting possible diagnoses or treatment plans.* - *Automate routine administrative tasks, such as scheduling or managing patient records.* - *Enable virtual health assistants or chatbots that can answer patient questions or provide health advice.* - *Predict patient outcomes or identify high-risk patients by analyzing large datasets.* |
| --- |
| **Section 1: Demographics and Background Information** |
| 1.**Gender:**   - Woman - Man - Non-binary - Prefer not to say   2.**Age**   - Under 25 - 25-29 - 30-34 - 35 and above   3.**Which semester are you currently in within your medical studies?** *(This refers to the number of semesters you have completed in the medical degree program, not including semesters from other fields of study.)*    4.**Have you completed any previous studies or training in which you gained knowledge related to digital literacy or artificial intelligence (AI)?**   - Yes - No - Not sure / Cannot assess   5.**If yes / not sure, what kind of studies or training did you complete related to digital literacy or artificial intelligence?** *(Please describe briefly – e.g., course title, subject area, type of institution, online certification, etc.)*    6.**When thinking about your future medical specialty, which of the following is more important to you?** *(Please choose the option that reflects your current preference best)*   - Working closely with patients and focusing on human interaction (e.g., communication, empathy, counseling) - Working with advanced technologies, data, and digital tools (e.g., diagnostics, imaging, AI-supported systems) - A balanced combination of both - I am not sure yet   7.**Which medical specialty (or specialties) are you currently considering for your residency?** *Please select all options that apply to you. You may choose more than one answer. If a preferred option is not listed, please select “Other” and specify your answer.*   - Anesthesiology - Clinical Pharmacology - Human Genetics - Internal Medicine (Cardiology, Gastroenterology, Pulmonology, Nephrology, Hematology and Oncology, Endocrinology and Diabetology, Infectiology, Rheumatology) - Laboratory Medicine - Microbiology, Virology, and Infection Epidemiology - Neurosurgery - Neurology - Nuclear Medicine - Obstetrics and Gynecology - Occupational Medicine - Oral and Maxillofacial Surgery - Otorhinolaryngology (ENT) - Pathology - Pharmacology and Toxicology - Physical and Rehabilitative Medicine - Pediatrics (Neonatology) - Psychiatry and Psychotherapy/ Psychosomatic Medicine - Public Health - Radiology - Radiation Oncology - Surgery (General Surgery, Vascular Surgery, Cardiac Surgery, Orthopedics and Trauma Surgery, Plastic, Reconstructive and Aesthetic Surgery, Thoracic Surgery, Visceral Surgery) - Transfusion Medicine - Urology - Undecided - Other |
| **Section 2: Proficiency in Technical Tools and Software** |
| 8.**How would you rate your current skills and knowledge in the following areas?**   |  | Very low | Low | Moderate | High | Very High | | --- | --- | --- | --- | --- | --- | | Digital literacy |  |  |  |  |  | | Understanding of AI and its potential applications in healthcare |  |  |  |  |  |   9.**Which of the following general digital tools have you used or are comfortable using?** *Please select all options that apply to you. You may choose more than one answer.  If a preferred option is not listed, please select “Other” and specify your answer.*   - Word processing tools (e.g., Word, Google Docs, LibreOffice Writer) - Presentation software (e.g., PowerPoint, Google Slides, Keynote) - Spreadsheet tools (e.g., Excel, Google Sheets, LibreOffice Calc) - Cloud storage and file sharing (e.g., Google Drive, Dropbox, OneDrive) - Video conferencing platforms (e.g., Zoom, MS Teams, Webex) - Online survey or form tools (e.g., Google Forms, SurveyMonkey) - I have not used any of these tools - Other   10.**How often do you use the digital tools you selected in your studies or clinical training?** *(Please consider how often you use tools such as word processors, presentation software, spreadsheets, note-taking tools, or collaboration platforms.)*   - Daily - Weekly - Monthly - Yearly - Never   11.**Which of the following digital tools or platforms relevant to medical education or clinical practice are you familiar with or have used?** *Please select all options that apply to you. You may choose more than one answer. If a preferred option is not listed, please select “Other” and specify your answer.*   - Electronic Health Record (EHR) systems (e.g., for documentation, patient data access) - Clinical decision support systems (CDSS) - Medical databases and evidence-based platforms (e.g., UpToDate, PubMed, Cochrane Library) - Learning management systems (e.g., Moodle, AMBOSS, online modules) - Telemedicine platforms (e.g., for virtual consultations or case discussions) - Digital collaboration tools (e.g., MS Teams, Slack, shared clinical dashboards) - Data protection and privacy tools or practices (e.g., encryption, secure messaging) - Digital tools for patient education or engagement (e.g., apps, portals) - I have not used any of these tools - Other   12.**How often do you use the above selected digital tools / platforms that are relevant to medical education or clinical practice?** *(These may include clinical decision support tools, digital learning platforms,  etc.)*   - Daily - Weekly - Monthly - Yearly - Never   13.**Which of the following AI-related tools or platforms have you used or are familiar with?** *Please select all options that apply to you. You may choose more than one answer. If a preferred option is not listed, please select “Other” and specify your answer.*   - AI chatbots or language models (e.g., ChatGPT, Med-PaLM) - Machine learning platforms (e.g., TensorFlow, scikit-learn, PyTorch) - Medical AI tools (e.g., diagnostic support systems, radiology AI tools) - AI-based image analysis tools (e.g., computer vision tools in medical imaging) - AI tools integrated into EHR systems (e.g., clinical decision support) - I have not used any of these tools - Other   14.**How often do you use the AI-related tools or platforms you selected (e.g., ChatGPT, Med-PaLM, image analysis tools, predictive algorithms) in your studies or clinical learning?**   - Daily - Weekly - Monthly - Yearly - Never   15.**Do you own or use any medical gadgets or digital diagnostic tools?** *For example: Wearable health monitors (e.g., smartwatches with ECG or heart rate tracking); Digital stethoscope; Handheld ultrasound device; Portable ECG device; Digital otoscope or ophthalmoscope; Smart pulse oximeter or digital thermometer; Mobile medical apps with integrated hardware (e.g. for smartphone dermoscopy)*   - Yes - No   16.**How often do you use the medical gadgets or digital diagnostic tools you selected (e.g., handheld ultrasound, digital stethoscope, wearable health monitor)?**   - Daily - Weekly - Monthly - Yearly - Never |
| **Section 3: Attitudes Toward Technology in Medical Practice**  *As future physicians, you are expected to embody multiple roles at once—including those of a Medical Expert, Communicator, Collaborator, Leader, Health Advocate, Scholar, and Professional. Please keep in mind that these roles are not separate but coexist within you as a single practitioner. Reflect on how technology and AI affect each of these dimensions of your professional identity.* |
| 17.**How would you rate your overall interest in technology and digital innovations in the context of medicine and healthcare?** *(This may include AI, digital health tools, telemedicine, wearable devices, clinical software, etc.)*   - Very High - High - Moderate - Low - Very Low   18.**To what extent do you agree with the following statements about the use of technology in medical practice?**   |  | | Strongly agree | Agree | Neutral | Disagree | Strongly disagree | | --- | --- | --- | --- | --- | --- | --- | | 18.1. | A strong foundation in digital literacy and responsible use of AI tools is essential to providing accurate, efficient, and evidence-based patient care. |  |  |  |  |  | | 18.2. | While digital tools and AI can support communication, they must not compromise the quality of human connection in the doctor–patient relationship. |  |  |  |  |  | | 18.3. | Digital platforms and AI-supported systems can enhance interdisciplinary teamwork and care coordination when used thoughtfully and transparently. |  |  |  |  |  | | 18.4. | Physicians should take an active role in guiding the safe and effective integration of digital technologies and AI into clinical environments. |  |  |  |  |  | | 18.5. | Digital health technologies and AI have the potential to improve access to care and reduce disparities, but only if physicians advocate for equitable and ethical implementation. |  |  |  |  |  | | 18.6. | Lifelong learning in digital skills and the ability to critically evaluate AI applications are essential for maintaining medical competence. |  |  |  |  |  | | 18.7. | Ethical, legal, and professional responsibilities include ensuring secure and just use of digital data and AI systems in patient care. |  |  |  |  |  |   19.**Please indicate how much you agree with the following statements:**   |  | | Strongly agree | Agree | Neutral | Disagree | Strongly disagree | | --- | --- | --- | --- | --- | --- | --- | | 19.1. | Using digital and AI tools in medicine requires a new kind of clinical reasoning that goes beyond traditional training. |  |  |  |  |  | | 19.2. | Digital technologies are likely to become a core component of what defines medical expertise in the future. |  |  |  |  |  | | 19.3. | Technology can help me become a more efficient and informed physician, if I learn to use it correctly. |  |  |  |  |  | | 19.4. | I am interested in how data, algorithms, and decision-support systems can influence diagnosis and treatment. |  |  |  |  |  | | 19.5. | Incorporating AI into patient care requires the same level of critical thinking as interpreting lab results or imaging. |  |  |  |  |  | | 19.6. | I sometimes feel unprepared to critically assess the reliability or accuracy of digital or AI-based medical tools. |  |  |  |  |  | | 19.7. | The idea of relying on AI for clinical decisions makes me uneasy. |  |  |  |  |  | | 19.8. | I am concerned that new technologies might widen gaps between students with technical backgrounds and those without. |  |  |  |  |  | | 19.9. | I worry that I won’t have enough time during medical training to build the digital skills that will be expected of me. |  |  |  |  |  | | 19.10. | I feel pressure to appear tech-savvy, even when I’m not confident in using medical software or AI tools. |  |  |  |  |  | | 19.11. | I believe patients will increasingly expect their physicians to be competent with digital and AI-supported healthcare. |  |  |  |  |  | | 19.12. | In the future, physicians who ignore digital developments will be at a professional disadvantage. |  |  |  |  |  | |
| **Section 4: Expectations for Medical Education and Support** |
| 20.**Would you choose a medical university based on its inclusion of digital health and AI education?**   - Yes - No - Maybe   21.**Please rate how much you agree with each of the following statements.**   |  | | | Strongly agree | | Agree | | Neutral | | Disagree | | Strongly disagree | | | --- | --- | --- | --- | --- | --- | --- | --- | --- | --- | --- | --- | --- | | 21.1. | I expect my medical education to provide me with the digital competencies required for modern clinical practice. |  | |  | |  | |  | |  | | | 21.2. | I believe medical school should include structured training in artificial intelligence and its applications in healthcare. |  | |  | |  | |  | |  | | | 21.3. | I expect guidance on how to critically evaluate new medical technologies and AI applications. |  | |  | |  | |  | |  | | | 21.4. | There should be clear opportunities to learn how to ethically and safely use digital tools in patient care. |  | |  | |  | |  | |  | | | 21.5. | I would benefit from hands-on training with digital diagnostic tools and clinical software during my studies. |  | |  | |  | |  | |  | | | 21.6. | I would feel more confident entering residency if I had more formal instruction on digital literacy and health technologies. |  | |  | |  | |  | |  | | | 21.7. | I feel that my faculty or institution should help me stay updated with emerging digital trends in medicine. |  | |  | |  | |  | |  | | | 21.8. | I would appreciate mentorship or peer support when learning to use new technologies in clinical settings. |  | |  | |  | |  | |  | |   22.**Which formats would you prefer for learning about digital tools and AI in medicine?**  *Please select all options that apply to you. You may choose more than one answer. If a preferred option is not listed, please select “Other” and specify your answer.*   - Lectures or seminars - Small group discussions - Online modules - Problem-based learning with digital cases - Practical workshops or simulation - I don’t think it’s important for medical students to focus on digital or AI skills - Other   23.**Which types of hands-on experience would you find most helpful?** *Please select all options that apply to you. You may choose more than one answer. If a preferred option is not listed, please select “Other” and specify your answer.*   - Simulated patient cases using digital diagnostics - Training in interpreting AI-generated results - Practicing digital documentation - Shadowing clinicians using tech-enhanced tools - I don’t think it’s important for medical students to focus on digital or AI skills - Other   24.**Which forms of institutional support would help you most in learning digital and AI tools?***Please select all options that apply to you. You may choose more than one answer. If a preferred option is not listed, please select “Other” and specify your answer.*   - Clear learning objectives on tech topics - Dedicated faculty with expertise in digital medicine - Access to up-to-date tools or platforms - Peer-led digital skills support - Optional certificates or micro-credentials - I don’t think it’s important for medical students to focus on digital or AI skills - Other   26.**What additional support or training would help you feel better prepared to work in a technology-driven healthcare environment?** |
